# Supplementary material
Source: Frontiers journal article supplement (https://www.frontiersin.org/articles/484386)
Supplement: Table_1.pdf [file Table_1.pdf]

## Supplementary tables

Table S1. Comparison among models that include and exclude species and size as factors. Best model in black and italics.

| Model                                             | df               | AIC                 | BIC                 | logLik               | Test                 | L.Ratio            | p-value              |
|---------------------------------------------------|------------------|---------------------|---------------------|----------------------|----------------------|--------------------|----------------------|
| Full                                              | 289              | 1578.3              | 3154.2              | -500.1               |                      |                    |                      |
| Size*Exposure*Depth                               | 19               | 1012.8              | 1119.1              | -487.4               | 1 vs 2               | 25.5               | 1                    |
| Species*Exposure*Depth                            | 145              | 1213.8              | 2016.1              | -461.9               | 2 vs 3               | 51.0               | 1                    |
| Species*Size *Depth                               | 97               | 1070.1              | 1609.3              | -438.0               | 3 vs 4               | 47.7               | 0.4832               |
| Species* Size*Exposure                            | 97               | 1118.4              | 1657.5              | -462.2               |                      |                    |                      |
| Exposure*Depth                                    | 10               | 985.5               | 1041.6              | -482.8               | 5 vs 6               | 41.2               | 1                    |
| Species*Size                                      | 33               | 888.6               | 1073.1              | -411.3               | 6 vs 7               | 143.0              | <.0001               |
| <b><i>Species + Size<br/>(no interaction)</i></b> | <b><i>18</i></b> | <b><i>818.2</i></b> | <b><i>919.0</i></b> | <b><i>-391.1</i></b> | <b><i>7 vs 8</i></b> | <b><i>40.4</i></b> | <b><i>0.0004</i></b> |

Table S2. Description of the species sampled with mean thickness values, general characteristics of their colony growth and an illustration with the colony shape. Illustrations while maintain relative proportions among species are not drawn to scale.

| Specie                           | Colony shape                                            | Mean branch thickness (mm) | SD (mm) | Illustration                                                                          |
|----------------------------------|---------------------------------------------------------|----------------------------|---------|---------------------------------------------------------------------------------------|
| <i>Briareum asbestinum</i> (Br)  | Erect vertical and cylindrical (can also be encrusting) | 12.3                       | 1.6     |  |
| <i>Eunicea calyculata</i> (Ecal) | Dichotomous branching in all directions                 | 12.3                       | 3.5     |  |

|                                    |                                                                                              |      |     |                                                                                       |
|------------------------------------|----------------------------------------------------------------------------------------------|------|-----|---------------------------------------------------------------------------------------|
| <i>Eunicea lacinata</i><br>(Elac)  | Fingerlike colony of few thick long branches arising from near the base in all directions    | 12.6 | 1.8 |    |
| <i>Eunicea laxispica</i><br>(Elax) | Candelabrum with few branches chiefly in one plane                                           | 3.9  | 1.0 |    |
| <i>Eunicea succinea</i><br>(Esuc)  | Candelabrum or bushy mainly in one plane with branches arising near colony base              | 6.6  | 1.7 |   |
| <i>Eunicea tourneforti</i><br>(Et) | Candelabrum in single plane with long thick branches                                         | 9.2  | 1.5 |  |
| <i>Gorgonia ventalina</i><br>(Gv)  | Sea fan shape. Anastomosing branch structure with small interconnected branchlets (net like) | 1.8  | 1.2 |  |

|                                         |                                                                                                                                 |     |     |                                                                                       |
|-----------------------------------------|---------------------------------------------------------------------------------------------------------------------------------|-----|-----|---------------------------------------------------------------------------------------|
| <i>Muricea elongata</i><br>(Me)         | Tall, bushy;<br>branching is lateral<br>in lower part of<br>colony                                                              | 2.8 | 0.2 |    |
| <i>Muriceopsis flavida</i><br>(Mflv)    | Tall, plumose, with<br>several long main<br>branches and<br>sometimes with<br>secondary plumes<br>arising from main<br>branches | 2.5 | 0.9 |    |
| <i>Antillogorgia acerosa</i><br>(Aac)   | Pinnate, plumose;<br>often resembles<br>ostrich plumes                                                                          | 2.2 | 0.5 |   |
| <i>Antillogorgia Americana</i><br>(Aam) | Pinnate, plumose                                                                                                                | 2.9 | 0.4 |  |

|                                        |                                                                    |      |     |                                                                                       |
|----------------------------------------|--------------------------------------------------------------------|------|-----|---------------------------------------------------------------------------------------|
| <i>Eunicea flexuosa</i><br>(Eflx)      | Bushy,<br>candelabrum,<br>dichotomous<br>branching in one<br>plane | 4.0  | 0.6 | 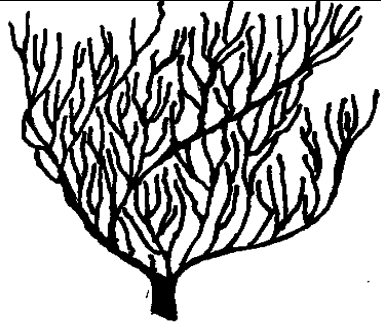   |
| <i>Plexaura homomalla</i><br>(Ph)      | Bushy but<br>branching in one<br>plane                             | 3.4  | 1.0 |    |
| <i>Plexaurella</i><br>spp.<br>(Plla)   | Bushy, branching in<br>several planes                              | 12.3 | 2.2 |   |
| <i>Pseudoplexaura</i><br>spp.<br>(Psx) | Branching, tree-like<br>colonies                                   | 5.6  | 2.0 |  |
